# Supplementary material
Source: Springer Nature journal article supplement (https://www.springermedizin.de/resource/supplementary/12873_2013_214_MOESM3_ESM.docx/9431666)
Supplement: MOESM3 [file 9431666]

|  | Frequency  (N and %) | Average ± SD |
| --- | --- | --- |
| Age (years)   - ≤60 - >60 | 417 (91.3)  50 (10.7) | 35.35 ± 18.03 |
| Gender   - Male - Female | 399 (85.4)  68 (14.6) |  |
| Mechanism of injury   - Blunt   - running over  - motorcycle crash  - car crash  - fall  - bicycle  - assault  - others   - Gunshot wound - Stab wound | 341 (73.0)  113 (24.2)  70 (15.0)  66 (14.2)  58 (12.4)  17 (3.6)  8 (1.7)  9 (1.9)  108 (23.2)  18 (3.5) |  |
| Signs of life on arrival   - Yes - No (DOA) | 325 (69.6)  142 (30.4) |  |
| Revised Trauma Score (RTS) |  | 5.24 ± 2.05 |
| Injury Severity Score (ISS) |  | 26.41 ± 9.00 |
